# Supplementary material
Source: Copernicus journal article supplement (doi:10.5194/egusphere-2026-3114)
Supplement: Supplementary file 1 [file egusphere-2026-3114-supplement.pdf]

# Quantifying Drivers of Tropospheric OH and Its Trends: Sensitivity to Atmospheric Processes and Implications for Methane Lifetime

Xuewei Hou<sup>1,2\*</sup>, Ryan Hossaini<sup>1\*</sup>, Oliver Wild<sup>1</sup>, Andrea Mazzeo<sup>1</sup>, Richard J. Pope<sup>3,4</sup>, Ye Wang<sup>1</sup>, Siyuan Wang<sup>5</sup>, Yuanhong Zhao<sup>6</sup>, James Lee<sup>7,8</sup>, Bin Zhu<sup>2</sup>, Tianliang Zhao<sup>2</sup>, Alok K. Pandey<sup>9</sup>

<sup>1</sup>Lancaster Environment Centre, Lancaster University, Lancaster, LA1 4YW, UK.

<sup>2</sup>Collaborative Innovation Center on Forecast and Evaluation of Meteorological Disasters, School of Atmospheric Physics, Nanjing University of Information Science and Technology, Nanjing, 210044, China.

<sup>3</sup>School of Earth and Environment, University of Leeds, Leeds, LS2 9JT, UK.

<sup>4</sup>National Centre for Earth Observation, University of Leeds, Leeds, LS2 9JT, UK.

<sup>5</sup>Department of Atmospheric Sciences, University of Miami, Florida, FL 33124, USA.

<sup>6</sup>State Key Laboratory of Physical Oceanography, Ocean University of China, Qingdao, 266100, China.

<sup>7</sup>Department of Chemistry, University of York, York, YO10 5DD, UK.

<sup>8</sup>National Centre for Atmospheric Science, University of York, York, YO10 5DD, UK.

<sup>9</sup>Department of Environmental Sciences, Deshbandhu College, University of Delhi, New Delhi, 110019, India.

Correspondence to: Xuewei Hou (x.hou4@lancaster.ac.uk) and Ryan Hossaini (r.hossaini@lancaster.ac.uk)

**Table S1. Bimolecular gas-phase reactions included in the FRSGC/UCI CTM.**

|    | Reactants                                          | Products                                       | $A$                    | $E_a/R$ | Ref. |
|----|----------------------------------------------------|------------------------------------------------|------------------------|---------|------|
| 1  | HO <sub>2</sub> +HO <sub>2</sub>                   | →H <sub>2</sub> O <sub>2</sub> +O <sub>2</sub> | 3.00×10 <sup>-13</sup> | -460    | [1]  |
| 2  | HO <sub>2</sub> +MeOO                              | →O <sub>2</sub> +MeOOH                         | 4.10×10 <sup>-13</sup> | -750    | [1]  |
| 3  | HO <sub>2</sub> +NO                                | →OH+NO <sub>2</sub>                            | 3.44×10 <sup>-12</sup> | -260    | [1]  |
| 4  | HO <sub>2</sub> +NO <sub>3</sub>                   | →O <sub>2</sub> +HONO <sub>2</sub>             | 1.75×10 <sup>-12</sup> | 0       | [1]  |
| 5  | HO <sub>2</sub> +NO <sub>3</sub>                   | →OH+NO <sub>2</sub> +O <sub>2</sub>            | 1.75×10 <sup>-12</sup> | 0       | [1]  |
| 6  | HO <sub>2</sub> +O <sub>3</sub>                    | →OH+O <sub>2</sub> +O <sub>2</sub>             | 1.00×10 <sup>-14</sup> | 490     | [1]  |
| 7  | MeOO+MeOO                                          | →2HCHO+2HO <sub>2</sub> +O <sub>2</sub>        | 9.50×10 <sup>-14</sup> | -390    | [1]  |
| 8  | MeOO+NO                                            | →HCHO+NO <sub>2</sub> +HO <sub>2</sub>         | 2.80×10 <sup>-12</sup> | -300    | [1]  |
| 9  | N <sub>2</sub> O <sub>5</sub> +H <sub>2</sub> O    | →HONO <sub>2</sub> +HONO <sub>2</sub>          | 2.00×10 <sup>-21</sup> | 0       | [1]  |
| 10 | NO+NO <sub>3</sub>                                 | →NO <sub>2</sub> +NO <sub>2</sub>              | 1.70×10 <sup>-11</sup> | -125    | [1]  |
| 11 | NO+O <sub>3</sub>                                  | →NO <sub>2</sub> +O <sub>2</sub>               | 3.00×10 <sup>-12</sup> | 1500    | [1]  |
| 12 | NO <sub>2</sub> +NO <sub>3</sub>                   | →NO+NO <sub>2</sub> +O <sub>2</sub>            | 4.35×10 <sup>-14</sup> | 1335    | [1]  |
| 13 | NO <sub>2</sub> +O <sub>3</sub>                    | →NO <sub>3</sub> +O <sub>2</sub>               | 1.20×10 <sup>-13</sup> | 2450    | [1]  |
| 14 | NO <sub>3</sub> +HCHO                              | →HONO <sub>2</sub> +CO+HO <sub>2</sub>         | 5.80×10 <sup>-16</sup> | 0       | [1]  |
| 15 | O( <sup>3</sup> P)+H <sub>2</sub> O <sub>2</sub>   | →OH+HO <sub>2</sub>                            | 1.40×10 <sup>-12</sup> | 2000    | [1]  |
| 16 | O( <sup>3</sup> P)+HCHO                            | →OH+CO+HO <sub>2</sub>                         | 3.40×10 <sup>-11</sup> | 1600    | [1]  |
| 17 | O( <sup>3</sup> P)+HO <sub>2</sub>                 | →OH+O <sub>2</sub>                             | 3.00×10 <sup>-11</sup> | -200    | [1]  |
| 18 | O( <sup>3</sup> P)+HO <sub>2</sub> NO <sub>2</sub> | →products                                      | 7.80×10 <sup>-11</sup> | 3400    | [1]  |
| 19 | O( <sup>3</sup> P)+HONO <sub>2</sub>               | →OH+NO <sub>3</sub>                            | 3.00×10 <sup>-17</sup> | 0       | [1]  |
| 20 | O( <sup>3</sup> P)+N <sub>2</sub> O <sub>5</sub>   | →products                                      | 3.00×10 <sup>-16</sup> | 0       | [1]  |
| 21 | O( <sup>3</sup> P)+NO <sub>2</sub>                 | →O <sub>2</sub> +NO                            | 5.10×10 <sup>-12</sup> | -198    | [2]  |
| 22 | O( <sup>3</sup> P)+NO <sub>3</sub>                 | →O <sub>2</sub> +NO <sub>2</sub>               | 1.30×10 <sup>-11</sup> | 0       | [1]  |
| 23 | O( <sup>3</sup> P)+O <sub>3</sub>                  | →O <sub>2</sub> +O <sub>2</sub>                | 8.00×10 <sup>-12</sup> | 2060    | [1]  |
| 24 | O( <sup>3</sup> P)+OH                              | →O <sub>2</sub> +HO <sub>2</sub>               | 1.80×10 <sup>-11</sup> | -180    | [1]  |
| 25 | O( <sup>1</sup> D)+CH <sub>4</sub>                 | →OH+MeOO                                       | 1.66×10 <sup>-10</sup> | 0       | [1]  |

|    |                                      |                                                        |                        |       |     |
|----|--------------------------------------|--------------------------------------------------------|------------------------|-------|-----|
| 26 | O( <sup>1</sup> D)+CH <sub>4</sub>   | →HCHO+H <sub>2</sub>                                   | 8.75×10 <sup>-12</sup> | 0     | [1] |
| 27 | O( <sup>1</sup> D)+H <sub>2</sub> O  | →OH+OH                                                 | 1.63×10 <sup>-10</sup> | -60   | [1] |
| 28 | O( <sup>1</sup> D)+N <sub>2</sub>    | →O( <sup>3</sup> P)+N <sub>2</sub>                     | 2.15×10 <sup>-11</sup> | -110  | [1] |
| 29 | O( <sup>1</sup> D)+O <sub>2</sub>    | →O( <sup>3</sup> P)+O <sub>2</sub>                     | 3.3×10 <sup>-11</sup>  | -55   | [1] |
| 30 | O( <sup>1</sup> D)+O <sub>3</sub>    | →O <sub>2</sub> +O( <sup>3</sup> P)+O( <sup>3</sup> P) | 1.2×10 <sup>-10</sup>  | 0     | [1] |
| 31 | O( <sup>1</sup> D)+O <sub>3</sub>    | →O <sub>2</sub> +O <sub>2</sub>                        | 1.2×10 <sup>-10</sup>  | 0     | [1] |
| 32 | OH+CH <sub>4</sub>                   | →H <sub>2</sub> O+MeOO                                 | 2.45×10 <sup>-12</sup> | 1775  | [1] |
| 33 | OH+CO                                | →HO <sub>2</sub> +CO <sub>2</sub>                      | 1.5×10 <sup>-13</sup>  | 0     | [4] |
| 34 | OH+H <sub>2</sub>                    | →H <sub>2</sub> O+HO <sub>2</sub>                      | 2.8×10 <sup>-12</sup>  | 1800  | [1] |
| 35 | OH+H <sub>2</sub> O <sub>2</sub>     | →H <sub>2</sub> O+HO <sub>2</sub>                      | 1.8×10 <sup>-12</sup>  | 0     | [1] |
| 36 | OH+HCHO                              | →H <sub>2</sub> O+CO+HO <sub>2</sub>                   | 5.5×10 <sup>-12</sup>  | -120  | [1] |
| 37 | OH+HO <sub>2</sub>                   | →H <sub>2</sub> O+O <sub>2</sub>                       | 4.8×10 <sup>-11</sup>  | -250  | [1] |
| 38 | OH+HO <sub>2</sub> NO <sub>2</sub>   | →H <sub>2</sub> O+NO <sub>2</sub>                      | 4.5×10 <sup>-13</sup>  | -610  | [1] |
| 39 | OH+HONO <sub>2</sub>                 | →H <sub>2</sub> O+NO <sub>3</sub>                      | 1.5×10 <sup>-13</sup>  | 0     | [3] |
| 40 | OH+MeOOH                             | →H <sub>2</sub> O+HCHO+OH                              | 1.14×10 <sup>-12</sup> | -200  | [1] |
| 41 | OH+MeOOH                             | →H <sub>2</sub> O+MeOO                                 | 2.66×10 <sup>-12</sup> | -200  | [1] |
| 42 | OH+NO <sub>3</sub>                   | →HO <sub>2</sub> +NO <sub>2</sub>                      | 2×10 <sup>-11</sup>    | 0     | [1] |
| 43 | OH+O <sub>3</sub>                    | →HO <sub>2</sub> +O <sub>2</sub>                       | 1.7×10 <sup>-12</sup>  | 940   | [1] |
| 44 | OH+OH                                | →H <sub>2</sub> O+O( <sup>3</sup> P)                   | 1.8×10 <sup>-12</sup>  | 0     | [1] |
| 45 | C <sub>2</sub> H <sub>6</sub> +OH    | →EtOO                                                  | 7.66×10 <sup>-12</sup> | 1020  | [1] |
| 46 | EtOO+NO                              | →MeCHO+HO <sub>2</sub> +NO <sub>2</sub>                | 2.6×10 <sup>-12</sup>  | -365  | [1] |
| 47 | EtOO+EtOO                            | →2MeCHO+2HO <sub>2</sub>                               | 6.8×10 <sup>-14</sup>  | 0     | [1] |
| 48 | EtOO+MeOO                            | →MeCHO+HCHO+2HO <sub>2</sub>                           | 2.5×10 <sup>-14</sup>  | 0     | [4] |
| 49 | MeCHO+OH                             | →0.5MeCO <sub>3</sub> +0.5MeOO+0.5CO                   | 4.63×10 <sup>-12</sup> | -350  | [1] |
| 50 | MeCHO+NO <sub>3</sub>                | →MeCO <sub>3</sub> +HONO <sub>2</sub>                  | 1.4×10 <sup>-12</sup>  | 1900  | [1] |
| 51 | MeCO <sub>3</sub> +NO                | →MeOO+NO <sub>2</sub>                                  | 8×10 <sup>-12</sup>    | -270  | [1] |
| 52 | MeOO+MeCO <sub>3</sub>               | →HCHO+MeOO+HO <sub>2</sub>                             | 2×10 <sup>-12</sup>    | -500  | [1] |
| 53 | MeCO <sub>3</sub> +MeCO <sub>3</sub> | →MeOO+MeOO                                             | 2.9×10 <sup>-12</sup>  | -500  | [1] |
| 54 | PAN+OH                               | →HCHO+NO <sub>2</sub>                                  | 4×10 <sup>-14</sup>    | 0     | [1] |
| 55 | EtOO+HO <sub>2</sub>                 | →EtOOH                                                 | 7.5×10 <sup>-13</sup>  | -700  | [1] |
| 56 | EtOOH+OH                             | →EtOO+H <sub>2</sub> O                                 | 1.9×10 <sup>-12</sup>  | -190  | [5] |
| 57 | EtOOH+OH                             | →MeCHO+OH                                              | 8.01×10 <sup>-12</sup> | 0     | [5] |
| 58 | Alkane+OH                            | →EtOO+MeOO+CO                                          | 1.02×10 <sup>-11</sup> | 430   | [1] |
| 59 | Alkene+O <sub>3</sub>                | →HCHO+0.5MeCHO+CO                                      | 6.5×10 <sup>-15</sup>  | 1900  | [1] |
| 60 | ROHOO+NO                             | →HCHO+MeCHO+NO <sub>2</sub>                            | 2.7×10 <sup>-12</sup>  | -360  | [5] |
| 61 | ROHOO+HO <sub>2</sub>                | →HCHO+MeCHO+OH                                         | 1.53×10 <sup>-13</sup> | -1300 | [5] |
| 62 | ROHOO+MeOO                           | →2HCHO+MeCHO+HO <sub>2</sub>                           | 1×10 <sup>-13</sup>    | 0     | [5] |
| 63 | Aromatic+OH                          | →ArOO+HO <sub>2</sub>                                  | 1.8×10 <sup>-12</sup>  | -340  | [5] |
| 64 | ArOO+NO                              | →MeCO <sub>3</sub> +4CO+NO <sub>2</sub>                | 4.2×10 <sup>-12</sup>  | -360  | [5] |
| 65 | ArOO+HO <sub>2</sub>                 | →MeCO <sub>3</sub> +4CO+OH                             | 1.5×10 <sup>-13</sup>  | -1310 | [5] |
| 66 | Isoprene+O <sub>3</sub>              | →MVKMACR+HCHO+OH                                       | 1.1×10 <sup>-14</sup>  | 2000  | [1] |
| 67 | Isoprene+OH                          | →IsopOO                                                | 3×10 <sup>-11</sup>    | -360  | [1] |
| 68 | IsopOO+NO                            | →MVKMACR+HCHO+NO <sub>2</sub>                          | 2.7×10 <sup>-12</sup>  | -360  | [5] |
| 69 | IsopOO+HO <sub>2</sub>               | →EtOOH+CO+CO                                           | 2.05×10 <sup>-13</sup> | -1300 | [5] |
| 70 | IsopOO+MeOO                          | →MVKMACR+2HCHO+2HO <sub>2</sub>                        | 1×10 <sup>-13</sup>    | 0     | [5] |
| 71 | MVKMACR+O <sub>3</sub>               | →0.5MeCO <sub>3</sub> +HCHO+MeOO                       | 8.5×10 <sup>-16</sup>  | 1520  | [5] |
| 72 | MVKMACR+OH                           | →MVKOO                                                 | 2.6×10 <sup>-12</sup>  | -610  | [5] |
| 73 | MVKOO+NO                             | →0.5MeCO <sub>3</sub> +HCHO+NO <sub>2</sub>            | 2.7×10 <sup>-12</sup>  | -360  | [5] |
| 74 | MVKOO+HO <sub>2</sub>                | →EtOOH+CO                                              | 1.82×10 <sup>-13</sup> | -1300 | [5] |
| 75 | MVKOO+MeOO                           | →MeCO <sub>3</sub> +2HCHO+HO <sub>2</sub>              | 1×10 <sup>-13</sup>    | 0     | [5] |

Note: T is the model grid-box temperature in Kelvin.  $k=A\exp(-E_a/(RT))$ . 1. Burkholder et al., 2020; 2. <https://iupac.aeris-data.fr/catalogue/#/catalogue/classifications/gap>, last access: 16 January 2026; 3. Atkinson et al., 2004; 4. Atkinson et al., 2006; 5. <https://mcm.york.ac.uk/MCM/>, last access: 16 January 2026.

**Table S2. Termolecular gas-phase reactions included in the FRSGC/UCI CTM.**

|    | Reactants                             | Products                                          | $f$  | $k_1$                  | $\alpha_1$ | $\beta_1$ | $k_2$                  | $\alpha_2$ | $\beta_2$ | Ref   |
|----|---------------------------------------|---------------------------------------------------|------|------------------------|------------|-----------|------------------------|------------|-----------|-------|
| 1  | HO <sub>2</sub> +HO <sub>2</sub> +M   | →H <sub>2</sub> O <sub>2</sub> +O <sub>2</sub> +M | 0.00 | 2.10×10 <sup>-33</sup> | 0.00       | -920.0    | 0.00                   | 0.00       | 0.0       | [1]   |
| 2  | HO <sub>2</sub> +NO <sub>2</sub> +M   | →HO <sub>2</sub> NO <sub>2</sub> +M               | 0.60 | 1.90×10 <sup>-31</sup> | -3.40      | 0.0       | 6.00×10 <sup>-12</sup> | -0.30      | 0.0       | [2]   |
| 3  | HO <sub>2</sub> NO <sub>2</sub> +M    | →HO <sub>2</sub> +NO <sub>2</sub> +M              | 0.50 | 4.10×10 <sup>-05</sup> | 0.00       | 10650.0   | 5.70×10 <sup>+15</sup> | 0.00       | 11170.0   | [3]   |
| 4  | N <sub>2</sub> O <sub>5</sub> +M      | →NO <sub>2</sub> +NO <sub>3</sub> +M              | 0.35 | 1.30×10 <sup>-03</sup> | -3.50      | 11000.0   | 9.70×10 <sup>+14</sup> | 0.10       | 11080.0   | [4]   |
| 5  | NO+NO+M                               | →NO <sub>2</sub> +NO <sub>2</sub> +M              | 0.00 | 4.25×10 <sup>-39</sup> | 0.00       | -663.5    | 0.00                   | 0.00       | 0.0       | [4]   |
| 6  | NO <sub>2</sub> +NO <sub>3</sub> +M   | →N <sub>2</sub> O <sub>5</sub> +M                 | 0.60 | 2.40×10 <sup>-30</sup> | -3.00      | 0.0       | 1.60×10 <sup>-12</sup> | 0.10       | 0.0       | [1]   |
| 7  | O( <sup>3</sup> P)+NO+M               | →NO <sub>2</sub> +M                               | 0.60 | 9.10×10 <sup>-32</sup> | -1.50      | 0.0       | 3.00×10 <sup>-11</sup> | 0.00       | 0.0       | [1]   |
| 8  | O( <sup>3</sup> P)+NO <sub>2</sub> +M | →NO <sub>3</sub> +M                               | 0.60 | 1.30×10 <sup>-31</sup> | -1.50      | 0.0       | 2.30×10 <sup>-11</sup> | -0.24      | 0.0       | [4]   |
| 9  | O( <sup>3</sup> P)+O <sub>2</sub> +M  | →O <sub>3</sub> +M                                | 0.00 | 6.10×10 <sup>-34</sup> | -2.40      | 0.0       | 0.00                   | 0.00       | 0.0       | [1]   |
| 10 | O( <sup>1</sup> D)+N <sub>2</sub> +M  | →N <sub>2</sub> O+M                               | 0.00 | 2.80×10 <sup>-36</sup> | -0.90      | 0.0       | 0.00                   | 0.00       | 0.0       | [1]   |
| 11 | OH+NO <sub>2</sub> +M                 | →HONO <sub>2</sub> +M                             | 0.60 | 2.00×10 <sup>-30</sup> | -3.60      | 0.0       | 3.60×10 <sup>-11</sup> | 0.00       | 0.0       | [2,5] |
| 12 | OH+OH+M                               | →H <sub>2</sub> O <sub>2</sub> +M                 | 0.60 | 6.90×10 <sup>-31</sup> | -1.00      | 0.0       | 2.60×10 <sup>-11</sup> | 0.00       | 0.0       | [1]   |
| 13 | MeCO <sub>3</sub> +NO <sub>2</sub> +M | →PAN+M                                            | 0.30 | 3.28×10 <sup>-28</sup> | -6.87      | 0.0       | 1.13×10 <sup>-11</sup> | -1.11      | 0.0       | [4]   |
| 14 | PAN+M                                 | →MeCO <sub>3</sub> +NO <sub>2</sub> +M            | 0.30 | 1.10×10 <sup>-05</sup> | 0.00       | 10100.0   | 1.90×10 <sup>+17</sup> | 0.00       | 14100.0   | [4]   |
| 15 | Alkene+OH+M                           | →ROHOO+M                                          | 0.60 | 4.70×10 <sup>-27</sup> | -4.00      | 0.0       | 2.60×10 <sup>-11</sup> | -1.30      | 0.0       | [1]   |

Note: T is the model grid-box temperature in Kelvin. 1. Burkholder et al., 2020; 2. Rolletter et al., 2025; 3. Atkinson et al., 2004; 4. <https://iupac.aeris-data.fr/catalogue/#/catalogue/classifications/gap>, last access: 18 March 2025; 5. Amedro et al., 2019.

$$k = \left( \frac{k_0[M]}{1+k_0[M]/k_\infty} \right) f \left( 1 + \left[ \log_{10} \left( \frac{k_0[M]}{k_\infty} \right) \right]^2 \right)^{-2} \quad (1)$$

$$k_0 = k_1 \left( \frac{T}{300} \right)^{\alpha_2} \exp \left( \frac{-\beta_1}{T} \right), \quad k_\infty = k_2 \left( \frac{T}{300} \right)^{\alpha_2} \exp \left( \frac{-\beta_2}{T} \right) \quad (2)$$

**Table S3. Photolysis reactions in the FRSGC/UCI CTM.**

|    | Reactants                           | Products                                | Ratio(%) |
|----|-------------------------------------|-----------------------------------------|----------|
| 1  | H <sub>2</sub> O+hv                 | OH+HO <sub>2</sub>                      | 0        |
| 2  | H <sub>2</sub> O <sub>2</sub> +hv   | 2OH                                     | 100      |
| 3  | HCHO+hv                             | CO+H <sub>2</sub>                       | 100      |
| 4  | HCHO+hv                             | CO+2HO <sub>2</sub>                     | 100      |
| 5  | HO <sub>2</sub> +hv                 | OH+O( <sup>3</sup> P)                   | 0        |
| 6  | HO <sub>2</sub> NO <sub>2</sub> +hv | OH+NO <sub>3</sub>                      | 33.3     |
| 7  | HO <sub>2</sub> NO <sub>2</sub> +hv | HO <sub>2</sub> +NO <sub>2</sub>        | 66.7     |
| 8  | HONO <sub>2</sub> +hv               | OH+NO <sub>2</sub>                      | 100      |
| 9  | MeOOH+hv                            | HCHO+OH+HO <sub>2</sub>                 | 50       |
| 10 | MeOOH+hv                            | HCHO+O( <sup>3</sup> P)+HO <sub>2</sub> | 50       |
| 11 | N <sub>2</sub> O <sub>5</sub> +hv   | NO <sub>3</sub> +NO <sub>2</sub>        | 100      |
| 12 | NO <sub>2</sub> +hv                 | NO+O( <sup>3</sup> p)                   | 100      |
| 13 | NO <sub>3</sub> +hv                 | NO+O <sub>2</sub>                       | 100      |
| 14 | NO <sub>3</sub> +hv                 | NO <sub>2</sub> +O( <sup>3</sup> P)     | 100      |
| 15 | O <sub>2</sub> +hv                  | 2O( <sup>3</sup> P)                     | 100      |
| 16 | O <sub>3</sub> +hv                  | O <sub>2</sub> +O( <sup>3</sup> P)      | 100      |
| 17 | O <sub>3</sub> +hv                  | O <sub>2</sub> +O( <sup>1</sup> D)      | 100      |
| 18 | MeCHO+hv                            | MeOO+HO <sub>2</sub> +CO                | 100      |
| 19 | MeCHO+hv                            | CH <sub>4</sub> +CO                     | 100      |
| 20 | PAN+hv                              | MeCO <sub>3</sub> +NO <sub>2</sub>      | 100      |

Note: These photolysis reactions refer Wild et al. (2000)

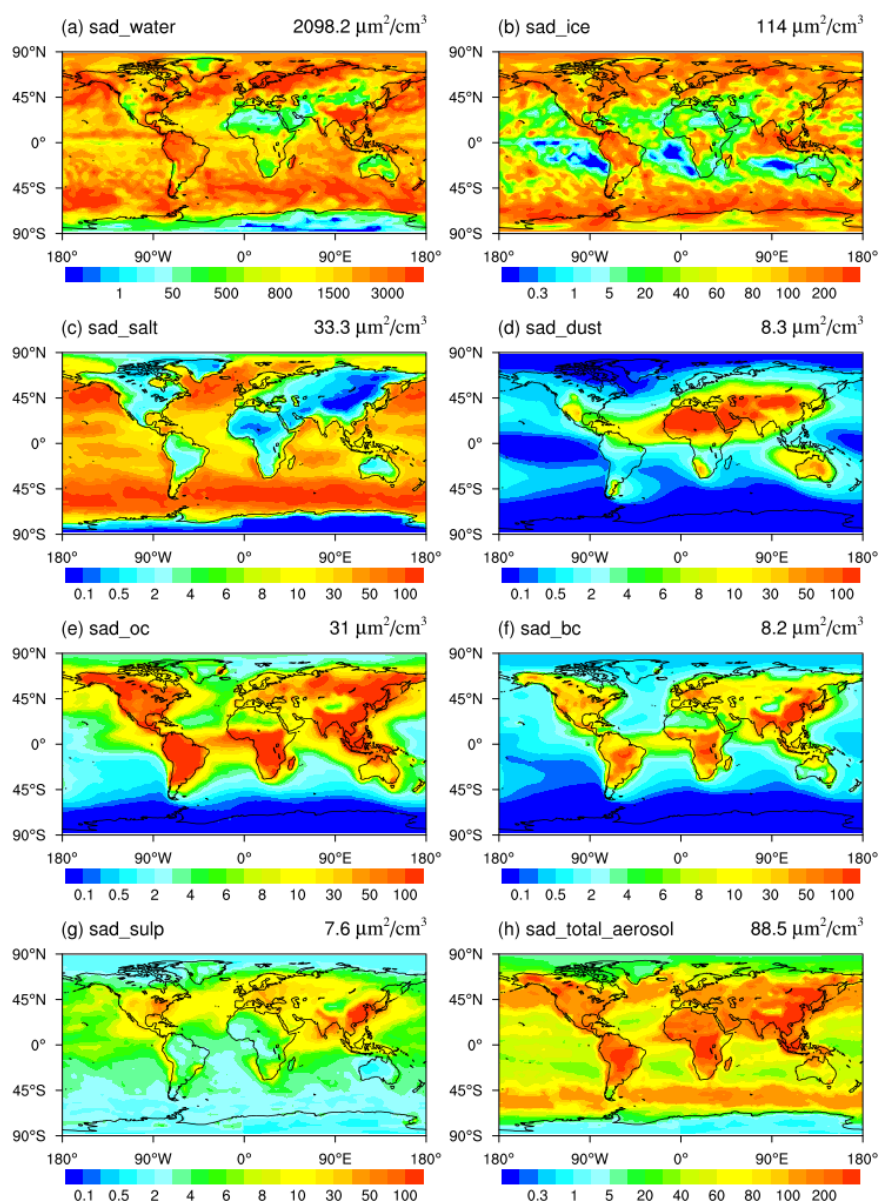

**Figure S1. Global maps of the annual mean surface area density (SAD) of cloud water (a), cloud ice (b), sea salt (c), dust (d), organic carbon (e), black carbon (f), sulphate (g) and the total aerosol surface area density (h). All fields are derived from three-dimensional datasets, with cloud water and cloud ice from ECMWF meteorological fields and aerosols from CAMS climatology. Cloud SAD is averaged over the troposphere, while aerosol SAD is shown at the surface. Units are  $\mu\text{m}^2\cdot\text{cm}^{-3}$ .**

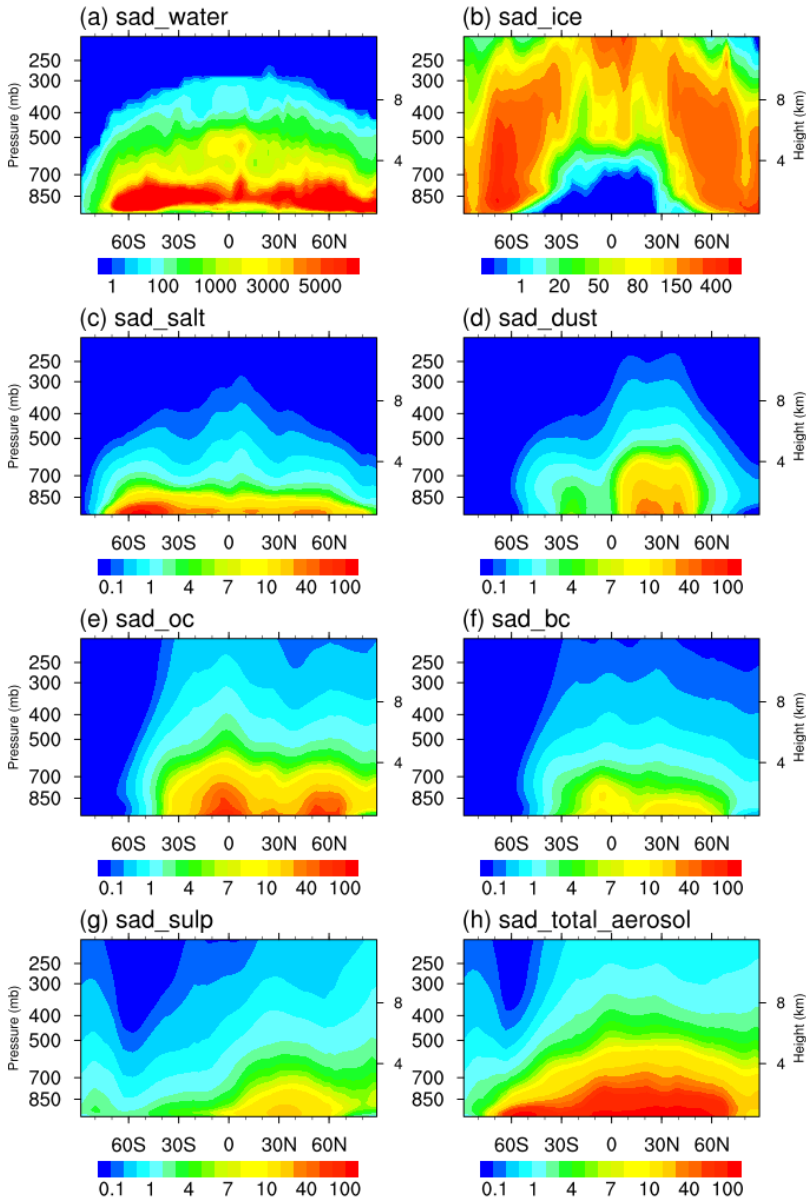

**Figure S2.** Annual Zonal-mean (latitude-pressure) cross sections of surface area density (SAD) for cloud water (a), cloud ice (b), sea salt (c), dust (d), organic carbon (e), black carbon (f), sulphate (g) and the total aerosol surface area density (h). Units are  $\mu\text{m}^2\cdot\text{cm}^{-3}$ .

**Table S4.** The uptake coefficient ( $\gamma$ ) in FRSGC/UCI CTM heterogeneous reactions.

| surface        | Uptake coefficient ( $\gamma$ )                                                                                                                                                                              |                                    |                                                                 |                                                              |
|----------------|--------------------------------------------------------------------------------------------------------------------------------------------------------------------------------------------------------------|------------------------------------|-----------------------------------------------------------------|--------------------------------------------------------------|
|                | $\text{N}_2\text{O}_5+\text{surface} \rightarrow 2\text{HONO}_2$                                                                                                                                             | $\text{HO}_2+\text{surface}^{[6]}$ | $\text{NO}_2+\text{surface} \rightarrow 0.5\text{HONO}_2^{[3]}$ | $\text{NO}_3+\text{surface} \rightarrow \text{HONO}_2^{[3]}$ |
| Water          | $2.7 \times 10^{-5} \exp(1800/T)^{[1]}$                                                                                                                                                                      | 0.1                                | $10^{-8}$                                                       | 0.002                                                        |
| Ice            | $0.02^{[2,3]}$                                                                                                                                                                                               | 0.1                                | 0                                                               | 0.001                                                        |
| Sea salt       | $0.005$ (RH<62%)<br>$0.03$ (RH $\geq$ 62%) <sup>[4,5]</sup>                                                                                                                                                  | 0.1                                | $10^{-8}$ (RH<40%)<br>$10^{-4}$ (RH $\geq$ 40%)                 | $0.05$ (RH<40%)<br>$0.002$ (RH $\geq$ 40%)                   |
| Dust           | $0.02^{[2,3]}$                                                                                                                                                                                               | 0.1                                | $10^{-8}$                                                       | 0.01                                                         |
| Organic Carbon | $\text{RH} \times 5.2 \times 10^{-4}$ (RH<57%)<br>$0.03$ (RH $\geq$ 57%) <sup>[4,5]</sup>                                                                                                                    | 0.1                                | $10^{-6}$                                                       | 0.005                                                        |
| Black Carbon   | $0.005^{[3,4]}$                                                                                                                                                                                              | 0.1                                | $10^{-4}$                                                       | $2.0 \times 10^{-4}$ (RH<50%)<br>$10^{-3}$ (RH $\geq$ 50%)   |
| Sulfate        | $\gamma = \alpha \times 10^\beta$ <sup>[4,5]</sup><br>$\alpha = 2.79 \times 10^{-4} + 1.3 \times 10^{-4} \times \text{RH} - 3.43 \times 10^{-6} \times \text{RH}^2 + 7.52 \times 10^{-8} \times \text{RH}^3$ | 0.1                                | $5.0 \times 10^{-6}$                                            | $0.001$ (RH<40%)<br>$0.002$ (RH $\geq$ 40%)                  |

$$\beta=4\times 10^{-2}\times(T-294) (T\geq 282K)$$

$$\beta=-0.48 (T<282K)$$

Note: T is temperature (K), RH is relative humidity (%). 1. Ammann et al. (2013); 2. Crowley et al. (2010); 3. Holmes et al. (2019); 4. Evans and Jacob (2005); 5. Monks et al. (2017); 6. Ha et al. (2021).

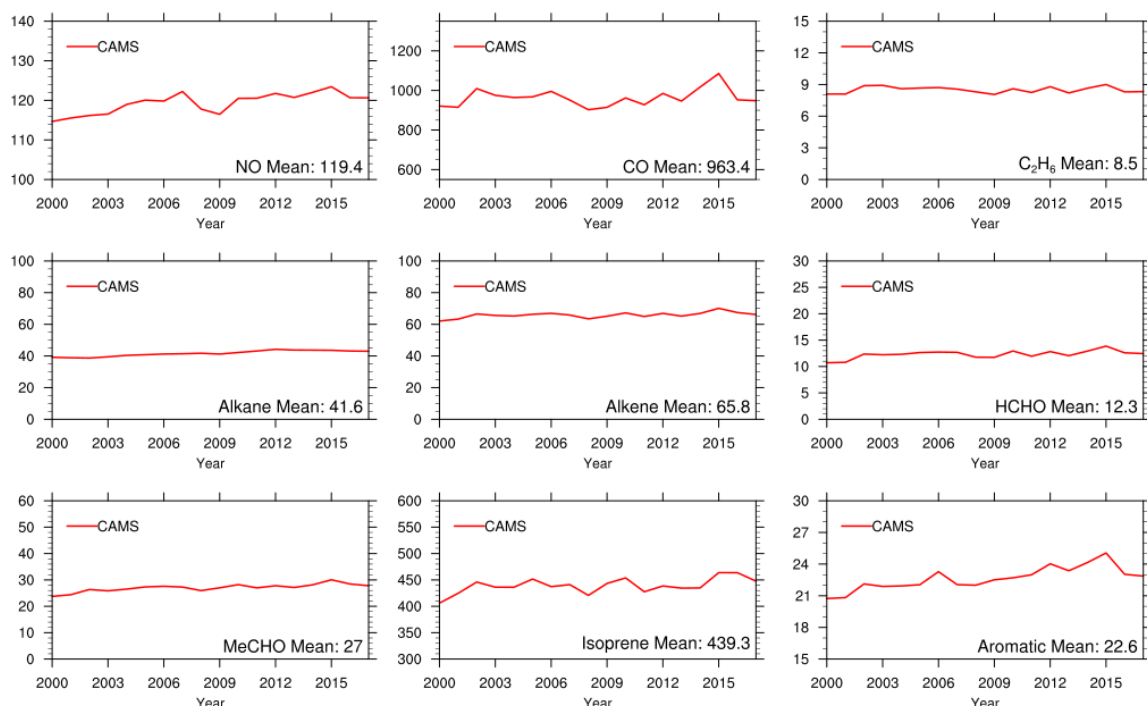

**Figure S3. Global annual emissions from all sources ( $Tg\cdot yr^{-1}$ ) during 2000–2017, derived from multiple emission inventories: CAMS (including anthropogenic, aircraft, biogenic, and soil sources), GFED4s (fires), and POET (ocean). Detailed descriptions of these emission inventories are provided in Section 2.4 of the main text. The values in the bottom of each panel are the multiyear average.**

**Table S5. Global tropospheric  $O_3$  burden (Tg) and budget terms ( $Tg\cdot yr^{-1}$ ) from previous model studies and this work.**

| Models                    | Prod      | Loss      | NetChem | Residual (STE) | DryDep   | Burden  | Lifetime (days) | Reference                    |
|---------------------------|-----------|-----------|---------|----------------|----------|---------|-----------------|------------------------------|
| 33                        | 3948±761  | 3745±554  | 245±346 | 636±273        | 902±255  | 307±38  | 21-25           | Wild (2007)                  |
| 17                        | 4465±514  | 4114±409  | 396±247 | 529±105        | 949±222  | 314±33  | 22±2            | Stevenson et al. (2006)      |
| 15                        | 5110±606  | 4668±727  | 442±309 | 552±168        | 1003±200 | 344±39  | 22±2            | Young et al. (2013)          |
| 4                         | 3987-5315 | 3576-4476 | 411-869 | 28-481         | 791-892  | 310-357 | 23-29           | Griffiths et al. (2021)      |
| CESM FCSD                 | 5038      | 4641      | 397     | 595            | 992      | 316/69  | 20              | Hou et al. (2023)            |
| FRSGC/UCI (T21L19)        | 4091      | 3854      | 237     | 519            | 757      | 283     | 23              | Wild et al. (2004)           |
| <b>FRSGC/UCI (T42L57)</b> |           |           |         |                |          |         |                 |                              |
| CTL                       | 5077±84   | 4379±86   | 698±16  | 316±21         | 1014±11  | 348±3   | 29±0.4          | This study<br>2000-2017 mean |
| fixEmis                   | 4952      | 4275      | 677     | 317            | 994      | 343     | 29              |                              |
| noWVA                     | 5149      | 4468      | 680     | 317            | 997      | 343     | 28              |                              |
| noCloud                   | 5152      | 4446      | 706     | 317            | 1024     | 353     | 29              |                              |
| noAero                    | 5229      | 4511      | 717     | 316            | 1034     | 351     | 28              |                              |
| noHete                    | 5314      | 4587      | 727     | 317            | 1044     | 356     | 28              |                              |
| JPL                       | 5374      | 4630      | 744     | 317            | 1061     | 363     | 29              |                              |

|          |      |      |     |     |      |     |    |                         |
|----------|------|------|-----|-----|------|-----|----|-------------------------|
| CTL      | 5231 | 4503 | 728 | 293 | 1021 | 351 | 28 | This study<br>2016-2017 |
| ALD-cesm | 5262 | 4528 | 734 | 292 | 1026 | 352 | 28 |                         |
| ALD-geoc | 5275 | 4539 | 736 | 292 | 1028 | 353 | 28 |                         |

Note: Prod for chemical production, Loss for chemical loss, NetChem for net chemical production (Prod-Loss) and DryDep for dry deposition; Residual is the term balance by Residual=Loss-Prod+DryDep. The values following the  $\pm$  in the CTL represent the standard deviation. Units of Prod, Loss, NetChem, Residual and DryDep are in  $\text{Tg}(\text{O}_3) \cdot \text{yr}^{-1}$ , Burden in  $\text{Tg}(\text{O}_3)$ , and Lifetime in days. The climatological pressure tropopause is used. The results of Griffiths et al. (2021) are the average of four models (UKESM1, CESM2-WACCM, GFDL-ESM4, MRI-ESM2-0), and the time is averaged from 1995 to 2004.

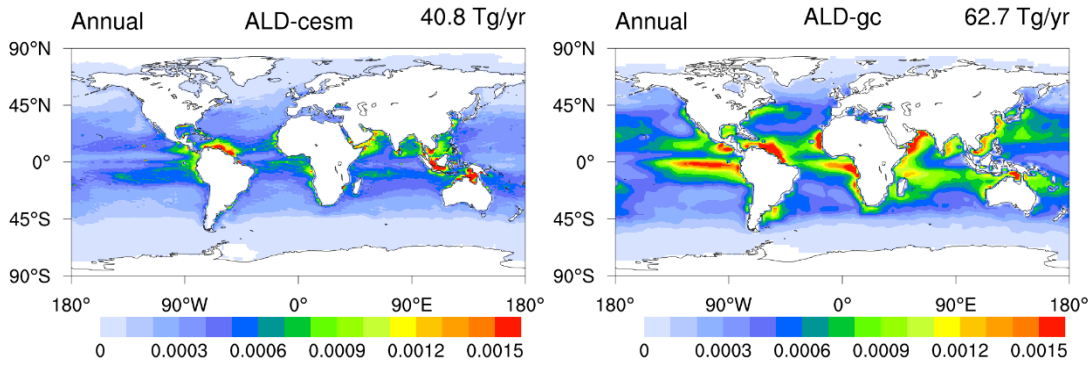

Figure S4 Simulated global distribution of CH<sub>3</sub>CHO ocean emissions (annual average) for ALD-cesm and ALD-gc runs.

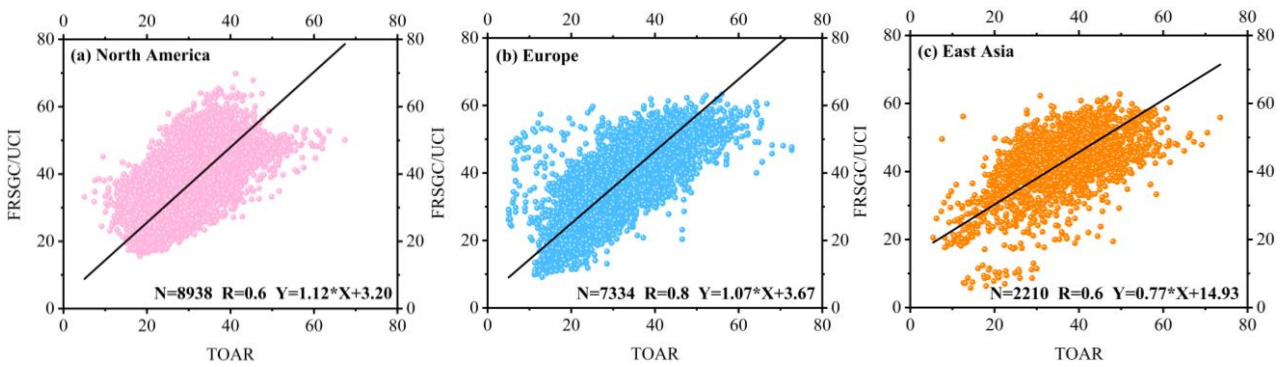

Figure S5. Scatter plots comparing monthly mean surface O<sub>3</sub> (ppbv) from the model control run with gridded observations from TOAR for three major regions: (a) North America, (b) Europe, and (c) East Asia during 2000–2014. Each point represents a monthly mean value for a grid cell within the corresponding region. The solid line indicates the linear regression fit, and number of data points (N), the correlation coefficient (R), and regression equation are shown in each panel.

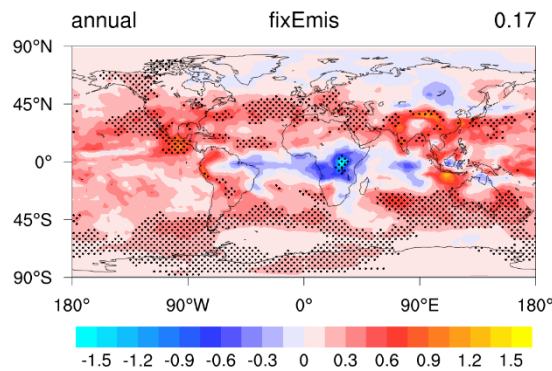

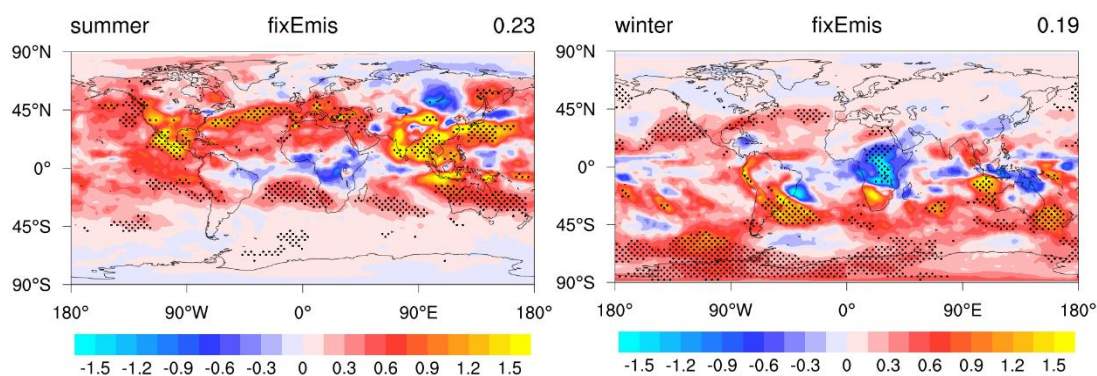

**Figure S6.** The trend of TCOH ( $10^{11} \text{ molec}\cdot\text{cm}^{-2}\cdot\text{yr}^{-1}$ ) in annual, winter and summer from 2000 to 2017. The troposphere was defined as the area below a climatological tropopause ( $p=300-215(\cos(\text{lat}))^2$ ) (as discussed in Lawrence et al. (2001)). Trends are calculated as the same as Figure 1. Using the fixEmis experiment in Table 1.

## References

- Amedro, D., Bunkan, A. J. C., Berasategui, M., and Crowley, J. N.: Kinetics of the OH + NO<sub>2</sub> reaction: rate coefficients (217–333 K, 16–1200 mbar) and fall-off parameters for N<sub>2</sub> and O<sub>2</sub> bath gases, *Atmos. Chem. Phys.*, 19, 10643–10657, <https://doi.org/10.5194/acp-19-10643-2019>, 2019.
- Ammann, M., Cox, R. A., Crowley, J. N., Jenkin, M. E., Mellouki, A., Rossi, M. J., Troe, J., and Wallington, T. J.: Evaluated kinetic and photochemical data for atmospheric chemistry: Volume VI – heterogeneous reactions with liquid substrates, *Atmos. Chem. Phys.*, 13, 8045–8228, <https://doi.org/10.5194/acp-13-8045-2013>, 2013.
- Atkinson, R., Baulch, D. L., Cox, R. A., Crowley, J. N., Hampson, R. F., Hynes, R. G., Jenkin, M. E., Rossi, M. J., and Troe, J.: Evaluated kinetic and photochemical data for atmospheric chemistry: Volume I - gas phase reactions of Ox, HOx, NOx and SOx species, *Atmos. Chem. Phys.*, 4, 1461–1738, <https://doi.org/10.5194/acp-4-1461-2004>, 2004.
- Atkinson, R., Baulch, D. L., Cox, R. A., Crowley, J. N., Hampson, R. F., Hynes, R. G., Jenkin, M. E., Rossi, M. J., Troe, J., and IUPAC Subcommittee: Evaluated kinetic and photochemical data for atmospheric chemistry: Volume II – gas phase reactions of organic species, *Atmos. Chem. Phys.*, 6, 3625–4055, <https://doi.org/10.5194/acp-6-3625-2006>, 2006.
- Burkholder, J. B., Sander, S. P., Abbatt, J., Barker, J. R., Cappa, C., Crouse, J. D., Dibble, T. S., Huie, R. E., Kolb, C. E., Kurylo, M. J., Orkin, V. L., Percival, C. J., Wilmouth, D. M., and Wine, P. H.: Chemical Kinetics and Photochemical Data for Use in Atmospheric Studies, Evaluation No. 19, JPL Publication 19-5, Jet Propulsion Laboratory, Pasadena, <https://dataverse.jpl.nasa.gov/dataset.xhtml?persistentId=hdl:2014/49199&version=2.1>, May 1, 2020.
- Crowley, J. N., Ammann, M., Cox, R. A., Hynes, R. G., Jenkin, M. E., Mellouki, A., Rossi, M. J., Troe, J., and Wallington, T. J.: Evaluated kinetic and photochemical data for atmospheric chemistry: Volume V – heterogeneous reactions on solid substrates, *Atmos. Chem. Phys.*, 10, 9059–9223, <https://doi.org/10.5194/acp-10-9059-2010>, 2010.
- Evans, M. J., and Jacob, D. J.: Impact of new laboratory studies of N<sub>2</sub>O<sub>5</sub> hydrolysis on global model budgets of tropospheric nitrogen oxides, ozone, and OH, *Geophysical Research Letters*, 32, L09813, <https://doi.org/10.1029/2005GL022469>, 2005.
- Griffiths, P. T., Murray, L. T., Zeng, G., Shin, Y. M., Abraham, N. L., Archibald, A. T., Deushi, M., Emmons, L. K., Galbally, I. E., Hassler, B., Horowitz, L. W., Keeble, J., Liu, J., Moeini, O., Naik, V., O'Connor, F. M., Oshima, N., Tarasick, D., Tilmes, S., Turnock, S. T., Wild, O., Young, P. J., and Zanis, P.: Tropospheric ozone in CMIP6 simulations, *Atmos. Chem. Phys.*, 21, 4187–4218, <https://doi.org/10.5194/acp-21-4187-2021>, 2021.
- Ha, P. T. M., Matsuda, R., Kanaya, Y., Taketani, F., and Sudo, K.: Effects of heterogeneous reactions on tropospheric chemistry: a global simulation with the chemistry–climate model CHASER V4.0, *Geosci. Model Dev.*, 14, 3813–3841, <https://doi.org/10.5194/gmd-14-3813-2021>, 2021.
- Holmes, C. D., Bertram, T. H., Confer, K. L., Graham, K. A., Ronan, A. C., Wirks, C. K., & Shah, V.: The role of clouds in the tropospheric NO<sub>x</sub> cycle: A new modelling approach for cloud chemistry and its global implications, *Geophys. Res. Lett.*, 46, 4980–4990. <https://doi.org/10.1029/2019GL081990>, 2019.
- Hou, X., Wild, O., Zhu, B., and Lee, J.: Future tropospheric ozone budget and distribution over east Asia under a net-zero scenario, *Atmos. Chem. Phys.*, 23, 15395–15411, <https://doi.org/10.5194/acp-23-15395-2023>, 2023.
- Lawrence, M. G., Jöckel, P., and von Kuhlmann, R.: What does the global mean OH concentration tell us?, *Atmos. Chem. Phys.*, 1, 37–49, <https://doi.org/10.5194/acp-1-37-2001>, 2001.

Monks, S. A., Arnold, S. R., Hollaway, M. J., Pope, R. J., Wilson, C., Feng, W., Emmerson, K. M., Kerridge, B. J., Latter, B. L., Miles, G. M., Siddans, R., and Chipperfield, M. P.: The TOMCAT global chemical transport model v1.6: description of chemical mechanism and model evaluation, *Geosci. Model Dev.*, 10, 3025–3057, <https://doi.org/10.5194/gmd-10-3025-2017>, 2017.

Naik, V., Voulgarakis, A., Fiore, A. M., Horowitz, L. W., Lamarque, J.-F., Lin, M., Prather, M. J., Young, P. J., Bergmann, D., Cameron-Smith, P. J., Cionni, I., Collins, W. J., Dalsøren, S. B., Doherty, R., Eyring, V., Faluvegi, G., Folberth, G. A., Josse, B., Lee, Y. H., MacKenzie, I. A., Nagashima, T., van Noije, T. P. C., Plummer, D. A., Righi, M., Rumbold, S. T., Skeie, R., Shindell, D. T., Stevenson, D. S., Strode, S., Sudo, K., Szopa, S., and Zeng, G.: Preindustrial to present-day changes in tropospheric hydroxyl radical and methane lifetime from the Atmospheric Chemistry and Climate Model Intercomparison Project (ACCMIP), *Atmos. Chem. Phys.*, 13, 5277–5298, <https://doi.org/10.5194/acp-13-5277-2013>, 2013.

Rolletter, M., Hofzumahaus, A., Novelli, A., Wahner, A., and Fuchs, H.: Kinetics of the reactions of OH with CO, NO, and NO<sub>2</sub> and of HO<sub>2</sub> with NO<sub>2</sub> in air at 1 atm pressure, room temperature, and tropospheric water vapour concentrations, *Atmos. Chem. Phys.*, 25, 3481–3502, <https://doi.org/10.5194/acp-25-3481-2025>, 2025.

Spivakovsky, C.M., Logan, J.A., Montzka, S.A., Balkanski, Y., Foreman-Fowler, M.S., Jones, D.B., Horowitz, L.W., Fusco, A.C., Brenninkmeijer, C.A., Prather, M.J., Wofsy, S.C., & McElroy, M.B.: Three-dimensional climatological distribution of tropospheric OH: Update and evaluation, *J. Geophys. Res.*, 105, 8931-8980, 2000.

Stevenson, D. S., Dentener, F. J., Schultz, M. G., Ellingsen, K., van Noije, T. P. C., Wild, O., Zeng, G., Amann, M., Atherton, C. S., Bell, N., Bergmann, D. J., Bey, I., Butler, T., Cofala, J., Collins, W. J., Derwent, R. G., Doherty, R. M., Drevet, J., Eskes, H. J., Fiore, A. M., Gauss, M., Hauglustaine, D. A., Horowitz, L. W., Isaksen, I. S. A., Krol, M. C., Lamarque, J. F., Lawrence, M. G., Montanaro, V., Müller, J. F., Pitari, G., Prather, M. J., Pyle, J. A., Rast, S., Rodriguez, J. M., Sanderson, M. G., Savage, N. H., Shindell, D. T., Strahan, S. E., Sudo, K., and Szopa, S.: Multimodel ensemble simulations of present-day and near-future tropospheric ozone, *J. Geophys. Res.-Atmos.*, 111, D08301, [doi:10.1029/2005jd006338](https://doi.org/10.1029/2005jd006338), 2006.

Wild, O.: Modelling the global tropospheric ozone budget: exploring the variability in current models, *Atmos. Chem. Phys.*, 7, 2643–2660, <https://doi.org/10.5194/acp-7-2643-2007>, 2007.

Wild, O., Pochanart, P., and Akimoto, H.: Trans-Eurasian of ozone and its precursors, *J. Geophys. Res.*, 109, D11302, [doi:10.1029/2003JD004501](https://doi.org/10.1029/2003JD004501), 2004.

Wild, O., Zhu, X., and Prather, M. J.: Fast-J: Accurate simulation of in- and below-cloud photolysis in tropospheric chemical models, *J. Atmos. Chem.*, 37, 245–282, <https://doi.org/10.1023/A:1006415919030>, 2000.

Young, P. J., Archibald, A. T., Bowman, K. W., Lamarque, J.-F., Naik, V., Stevenson, D. S., Tilmes, S., Voulgarakis, A., Wild, O., Bergmann, D., Cameron-Smith, P., Cionni, I., Collins, W. J., Dalsøren, S. B., Doherty, R. M., Eyring, V., Faluvegi, G., Horowitz, L. W., Josse, B., Lee, Y. H., MacKenzie, I. A., Nagashima, T., Plummer, D. A., Righi, M., Rumbold, S. T., Skeie, R. B., Shindell, D. T., Strode, S. A., Sudo, K., Szopa, S., and Zeng, G.: Pre-industrial to end 21st century projections of tropospheric ozone from the Atmospheric Chemistry and Climate Model Intercomparison Project (ACCMIP), *Atmos. Chem. Phys.*, 13, 2063–2090, <https://doi.org/10.5194/acp-13-2063-2013>, 2013.
